# Supplementary material for: Accelerating Development of Benziamidazole-Class Proton Pump Inhibitors: A Mechanism-Based PK/PD Model to Optimize Study Design with Ilaprazole as a Case Drug
Source: MDPI journal article supplement (doi:10.3390/pharmaceutics13030392), 2021-03-15
Supplement: s1 [file s1]

# Supplementary Materials: Accelerating Development of Benzi-amidazole-Class Proton Pump Inhibitors: A Mechanism-Based PK/PD Model to Optimize Study Design with Ilaprazole as a Case Drug

Ranran Jia, Fan Zhang, Ni Wu, Wen Xu, Huitao Gao, Bo Liu and Hongyun Wang \*

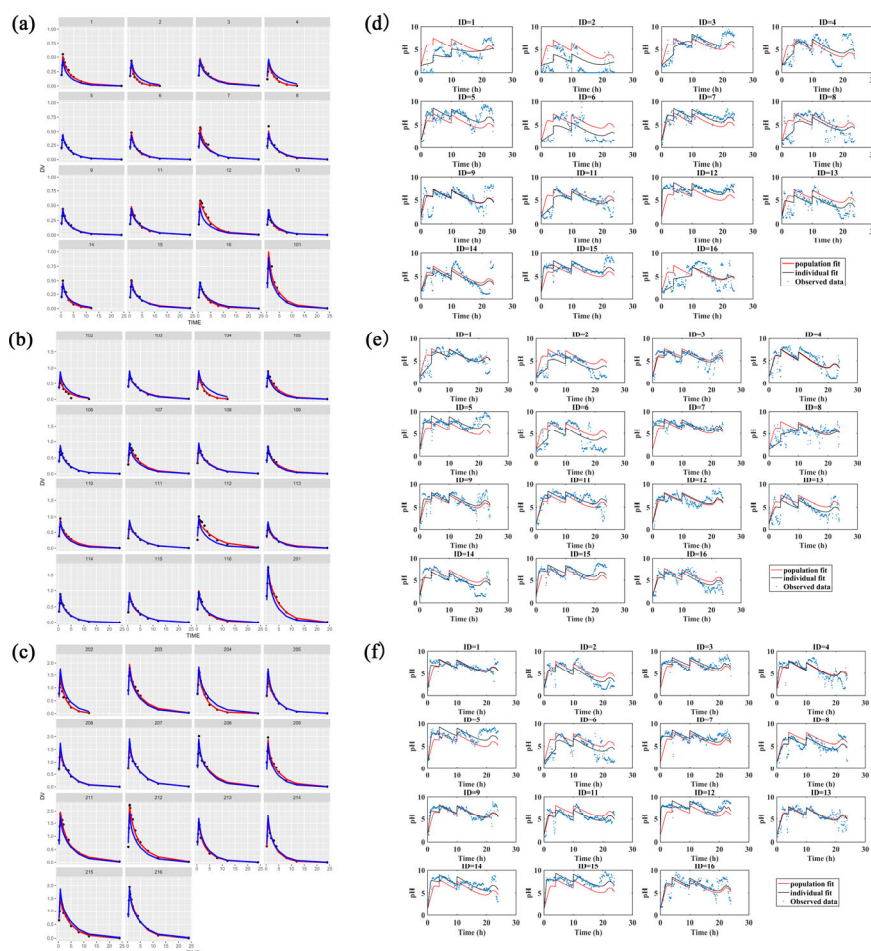

**Figure S1.** The ilaprazole plasma concentration versus time profiles for subjects after dosing 5 mg(a), 10 mg(b) and 20 mg(c) (blue lines, observed; red lines, individual fitted). And the individual 24-h intra-gastric pH profiles for subjects after dosing 5 mg(d), 10 mg(e) and 20 mg(f) (dots, observed; black lines, individual fitted; red lines, population fitted).
